# Supplementary material
Source: ML conference proceedings conference paper supplement (https://openaccess.thecvf.com/content/CVPR2024/html/Cui_On_the_Robustness_CVPR_2024_paper.html)
Supplement: Supplementary file 1 [file Cui_On_the_Robustness_CVPR_2024_supplemental.pdf]

# On the Robustness of Large Multimodal Models Against Image Adversarial Attacks

## Supplementary Material

| Transfer                  | Attack | Vis.Enc. Acc (%)  |                   | LMM Acc (%)       |                   |
|---------------------------|--------|-------------------|-------------------|-------------------|-------------------|
|                           |        | Post <sub>N</sub> | Post <sub>S</sub> | Post <sub>N</sub> | Post <sub>S</sub> |
| COCO                      |        |                   |                   |                   |                   |
| BLIP <sub>v</sub> → LLaVA | PGD    | 84.27 (-2)        | 64.97 (-27)       | 82.76 (-5)        | 66.77 (-24)       |
| BLIP <sub>v</sub> → LLaVA | APGD   | 85.09 (-2)        | 61.54 (-31)       | 82.89 (-5)        | 61.75 (-29)       |
| BLIP <sub>v</sub> → LLaVA | CW     | 86.57 (-2)        | 84.00 (-6)        | 84.56 (-3)        | 82.21 (-6)        |
| CLIP → BLIP2              | PGD    | 93.54 (-9)        | 90.28 (-4)        | 87.14 (-0)        | 83.79 (-3)        |
| CLIP → BLIP2              | APGD   | 93.29 (-9)        | 86.10 (-9)        | 87.03 (-1)        | 79.14 (-8)        |
| CLIP → BLIP2              | CW     | 93.64 (-9)        | 93.44 (-1)        | 87.44 (-0)        | 87.07 (-0)        |
| CLIP → Ins.BLIP           | PGD    | 93.54 (-5)        | 90.28 (-4)        | 89.28 (-1)        | 86.57 (-4)        |
| CLIP → Ins.BLIP           | APGD   | 93.29 (-5)        | 86.10 (-9)        | 89.13 (-1)        | 82.97 (-8)        |
| CLIP → Ins.BLIP           | CW     | 93.64 (-5)        | 93.44 (-1)        | 89.57 (-0)        | 89.21 (-1)        |
| Food-101                  |        |                   |                   |                   |                   |
| BLIP <sub>v</sub> → LLaVA | PGD    | 66.96 (-26)       | 36.84 (-59)       | 17.24 (-46)       | 10.54 (-67)       |
| BLIP <sub>v</sub> → LLaVA | APGD   | 70.10 (-22)       | 25.02 (-72)       | 18.38 (-42)       | 8.64 (-73)        |
| BLIP <sub>v</sub> → LLaVA | CW     | 79.00 (-12)       | 72.54 (-20)       | 22.06 (-31)       | 19.92 (-37)       |
| CLIP → BLIP2              | PGD    | 76.48 (-9)        | 50.44 (-40)       | 29.66 (-17)       | 20.28 (-43)       |
| CLIP → BLIP2              | APGD   | 73.44 (-13)       | 36.18 (-57)       | 28.88 (-19)       | 16.40 (-54)       |
| CLIP → BLIP2              | CW     | 76.30 (-9)        | 72 (-14)          | 30.34 (-15)       | 28.58 (-20)       |
| CLIP → Ins.BLIP           | PGD    | 76.48 (-9)        | 50.44 (-40)       | 23.34 (-14)       | 16.58 (-39)       |
| CLIP → Ins.BLIP           | APGD   | 73.44 (-13)       | 36.18 (-57)       | 22.42 (-17)       | 12.94 (-52)       |
| CLIP → Ins.BLIP           | CW     | 76.30 (-9)        | 72 (-14)          | 24.00 (-11)       | 23.64 (-12)       |

Table 1. Classification acc.@1 under untargeted transfer attacks for COCO and Food-101 [1]. For brevity, BLIP<sub>v</sub> refers to BLIP visual encoder, and Ins.BLIP refers to InstructBLIP. "Vis.Enc. Acc" shows the target LMMs' visual encoder's accuracy with adversarial input generated with the original visual encoder. Numbers in parenthesis show % change w.r.t. the pre-attack accuracy

### 1. Attacks

We use implementations from torchattacks [5] to generate adversarial images. All the attacks are un-targeted. Below in Fig. 1, we show more visualizations of adversarial images under different attacks, attack strength and models.

Among three types of attacks, APGD [2] generates the most perceptible perturbations, as can be seen in Fig. 1. On the contrary, CW yields the most imperceptible perturbations, even under the strong setting. All the three attacks are imperceptible under the normal setting.

By comparing adversarial images generated by CLIP and EVA-CLIP (top and bottom row from Fig. 1), we can observe adversarial perturbations generated under EVA-CLIP are generally more perceptible than that of CLIP's. We can also observe the interestingly highlighted patch border for EVA-CLIP under APGD<sub>S</sub>, which does not exist on that of CLIP's.

### 2. Additional experiments on classification

In Table 2 we present additional classification results for two fine-grained datasets: Food-101 and Stanford Cars. These results corroborate our prior observations, indicating that LMMs exhibit susceptibility to visual adversarial

| Model         | Attack | Visual Encoder Acc (%) |                   |                   | LMM Acc (%) |                   |                   |
|---------------|--------|------------------------|-------------------|-------------------|-------------|-------------------|-------------------|
|               |        | Pre                    | Post <sub>N</sub> | Post <sub>S</sub> | Pre         | Post <sub>N</sub> | Post <sub>S</sub> |
| Food-101      |        |                        |                   |                   |             |                   |                   |
| LLaVA1.5      | PGD    | 90.18                  | 11.21             | 0.44              | 31.80       | 5.00              | 1.18              |
| LLaVA1.5      | APGD   | 90.18                  | 1.53              | 0.00              | 31.80       | 4.66              | 2.38              |
| LLaVA1.5      | CW     | 90.18                  | 0.23              | 9.77              | 31.80       | 18.04             | 16.16             |
| BLIP2 T5      | PGD    | 84.07                  | 0.61              | 0.02              | 35.79       | 1.14              | 0.14              |
| BLIP2 T5      | APGD   | 84.07                  | 0.13              | 0.00              | 35.79       | 3.88              | 3.62              |
| BLIP2 T5      | CW     | 84.07                  | 4.39              | 0.59              | 35.79       | 18.32             | 15.18             |
| InstructBLIP  | PGD    | 84.07                  | 0.61              | 0.02              | 27.01       | 1.38              | 0.04              |
| InstructBLIP  | APGD   | 84.07                  | 0.13              | 0.00              | 27.01       | 3.78              | 3.62              |
| InstructBLIP  | CW     | 84.07                  | 4.39              | 0.59              | 27.01       | 19.90             | 16.62             |
| Stanford Cars |        |                        |                   |                   |             |                   |                   |
| LLaVA1.5      | PGD    | 77.42                  | 3.01              | 0.01              | 37.62       | 5.94              | 0.87              |
| LLaVA1.5      | APGD   | 77.42                  | 0.45              | 0.02              | 37.62       | 6.74              | 3.82              |
| LLaVA1.5      | CW     | 77.42                  | 6.04              | 0.33              | 37.62       | 25.88             | 23.48             |
| BLIP2 T5      | PGD    | 79.23                  | 0.07              | 0.00              | 61.75       | 0.52              | 0.54              |
| BLIP2 T5      | APGD   | 79.23                  | 0.00              | 0.00              | 61.75       | 0.54              | 0.39              |
| BLIP2 T5      | CW     | 79.23                  | 10.35             | 1.53              | 61.75       | 0.63              | 0.61              |
| InstructBLIP  | PGD    | 79.23                  | 0.07              | 0.00              | 16.86       | 0.47              | 0.02              |
| InstructBLIP  | APGD   | 79.23                  | 0.00              | 0.00              | 16.86       | 0.54              | 0.39              |
| InstructBLIP  | CW     | 79.23                  | 10.35             | 1.53              | 16.86       | 13.43             | 12.59             |

Table 2. Top-1 image classification result on Food-101 and Stanford Cars [6]. The "Visual Encoder Acc (%)" column refers to each LMM's visual encoder's accuracy (CLIP for LLaVA1.5, EVA-CLIP for BLIP2 and InstructBLIP).

inputs, with their performance directly related to the robustness of their visual encoders.

### 3. Transferability of Visual Attacks on LMMs

In Table 1 we provide preliminary results on transferability of visual attacks against LMMs by applying perturbations generated for one visual encoder to a non-matching LMM. We observe that the impact of transfer attack on LLMs is directly linked to the impact of transfer attack on their corresponding visual encoders. Therefore, in terms of visual transfer attack, studying its effect on LMMs may simply be reduced back to studying its effect on standalone vision models.

### 4. LLM Responses to Adversarial Visual Questions

Fig. 2 shows more results on per-question accuracy drop after adversarial attack. We observe consistent behavior across three tested LMMs (LLaVA [9], BLIP2-T5 [7] and InstructBLIP [3]), where accuracy drop the most on questions querying object types or attributes, such as "what animal/room/kind/type...".

In Fig. 3 and 4, we show more visualization on the three evaluated LMMs' responses to APGD and CW attacks under the strong setting. We can again observe that adversarial

images under APGD attack cause all three LMMs to output completely incorrect image descriptions, yet still having correct answers for “peripheral” questions, especially those querying the backgrounds. Notably, adversarial images generated under CW attack have little impact on all three LMMs, despite the relatively low classification accuracy after CW attack for CLIP and EVA-CLIP.

## References

- [1] Lukas Bossard, Matthieu Guillaumin, and Luc Van Gool. Food-101 – mining discriminative components with random forests. In *European Conference on Computer Vision*, 2014. [1](#)
- [2] Francesco Croce and Matthias Hein. Reliable evaluation of adversarial robustness with an ensemble of diverse parameter-free attacks. In *Proceedings of the 37th International Conference on Machine Learning*, pages 2206–2216. PMLR, 2020. [1](#)
- [3] Wenliang Dai, Junnan Li, Dongxu Li, Anthony Tiong, Junqi Zhao, Weisheng Wang, Boyang Li, Pascale Fung, and Steven Hoi. InstructBLIP: Towards general-purpose vision-language models with instruction tuning. In *Thirty-seventh Conference on Neural Information Processing Systems*, 2023. [1](#)
- [4] Yash Goyal, Tejas Khot, Douglas Summers-Stay, Dhruv Batra, and Devi Parikh. Making the v in vqa matter: Elevating the role of image understanding in visual question answering. In *Proceedings of the IEEE conference on computer vision and pattern recognition*, pages 6904–6913, 2017. [4](#), [5](#)
- [5] Hoki Kim. Torchattacks: A pytorch repository for adversarial attacks. *arXiv preprint arXiv:2010.01950*, 2020. [1](#)
- [6] Jonathan Krause, Michael Stark, Jia Deng, and Li Fei-Fei. 3d object representations for fine-grained categorization. In *2013 IEEE International Conference on Computer Vision Workshops*, pages 554–561, 2013. [1](#)
- [7] Junnan Li, Dongxu Li, Silvio Savarese, and Steven Hoi. BLIP-2: bootstrapping language-image pre-training with frozen image encoders and large language models. In *ICML*, 2023. [1](#)
- [8] Tsung-Yi Lin, Michael Maire, Serge Belongie, James Hays, Pietro Perona, Deva Ramanan, Piotr Dollár, and C Lawrence Zitnick. Microsoft coco: Common objects in context. In *Computer Vision—ECCV 2014: 13th European Conference, Zurich, Switzerland, September 6–12, 2014, Proceedings, Part V 13*, pages 740–755. Springer, 2014. [3](#)
- [9] Haotian Liu, Chunyuan Li, Qingyang Wu, and Yong Jae Lee. Visual instruction tuning. In *Thirty-seventh Conference on Neural Information Processing Systems*, 2023. [1](#)

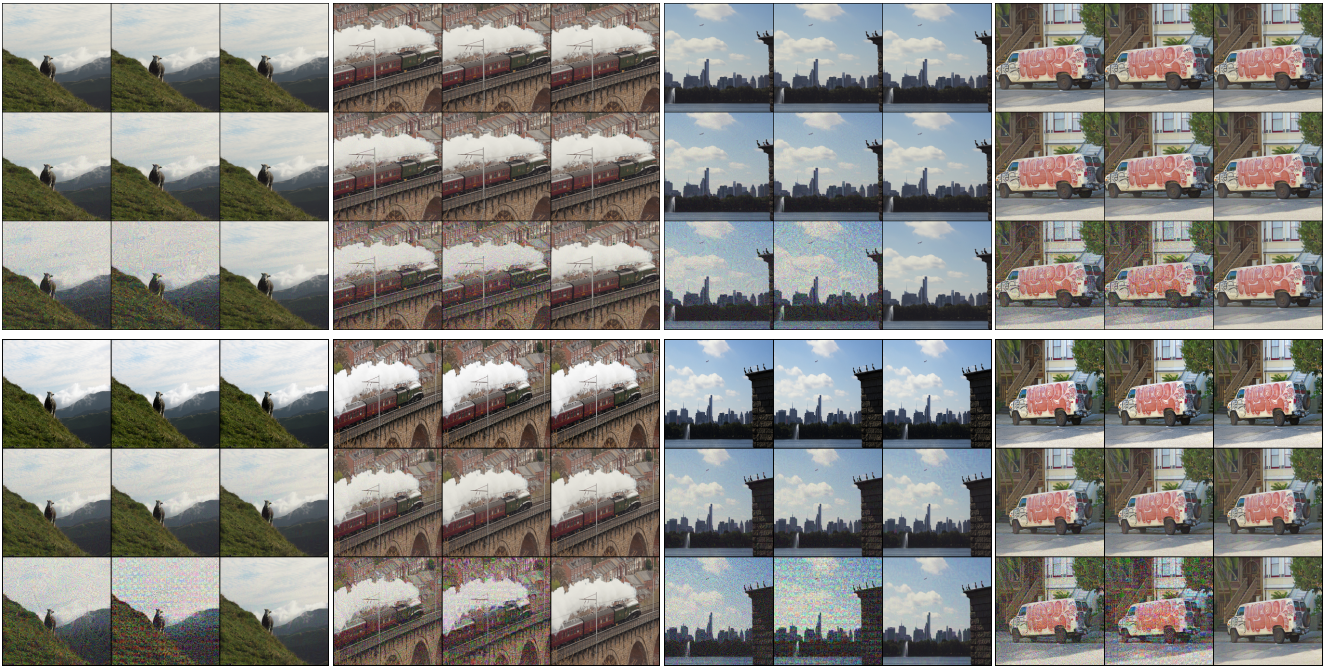

Figure 1. Visualization of three attacks generated from CLIP (top) and EVA-CLIP (bottom). In each of the  $3 \times 3$  cell, top/mid/bottom row is from clean/normal/strong, and left/mid/right column is from PGD/APGD/CW attack, respectively. Image source: COCO val2014 [8].

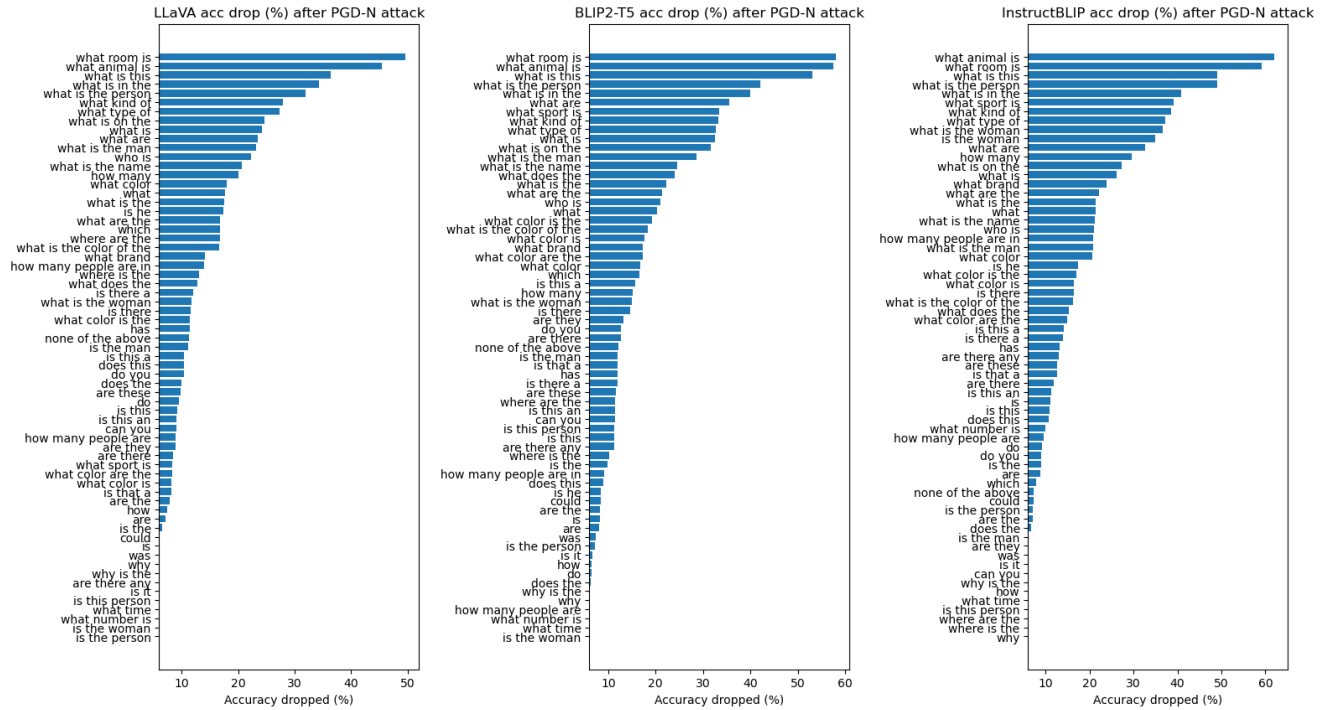

Figure 2. VQA V2 per question-type accuracy drop on LLaVA, BLIP2-T5 and InstructBLIP under PGD<sub>N</sub>.



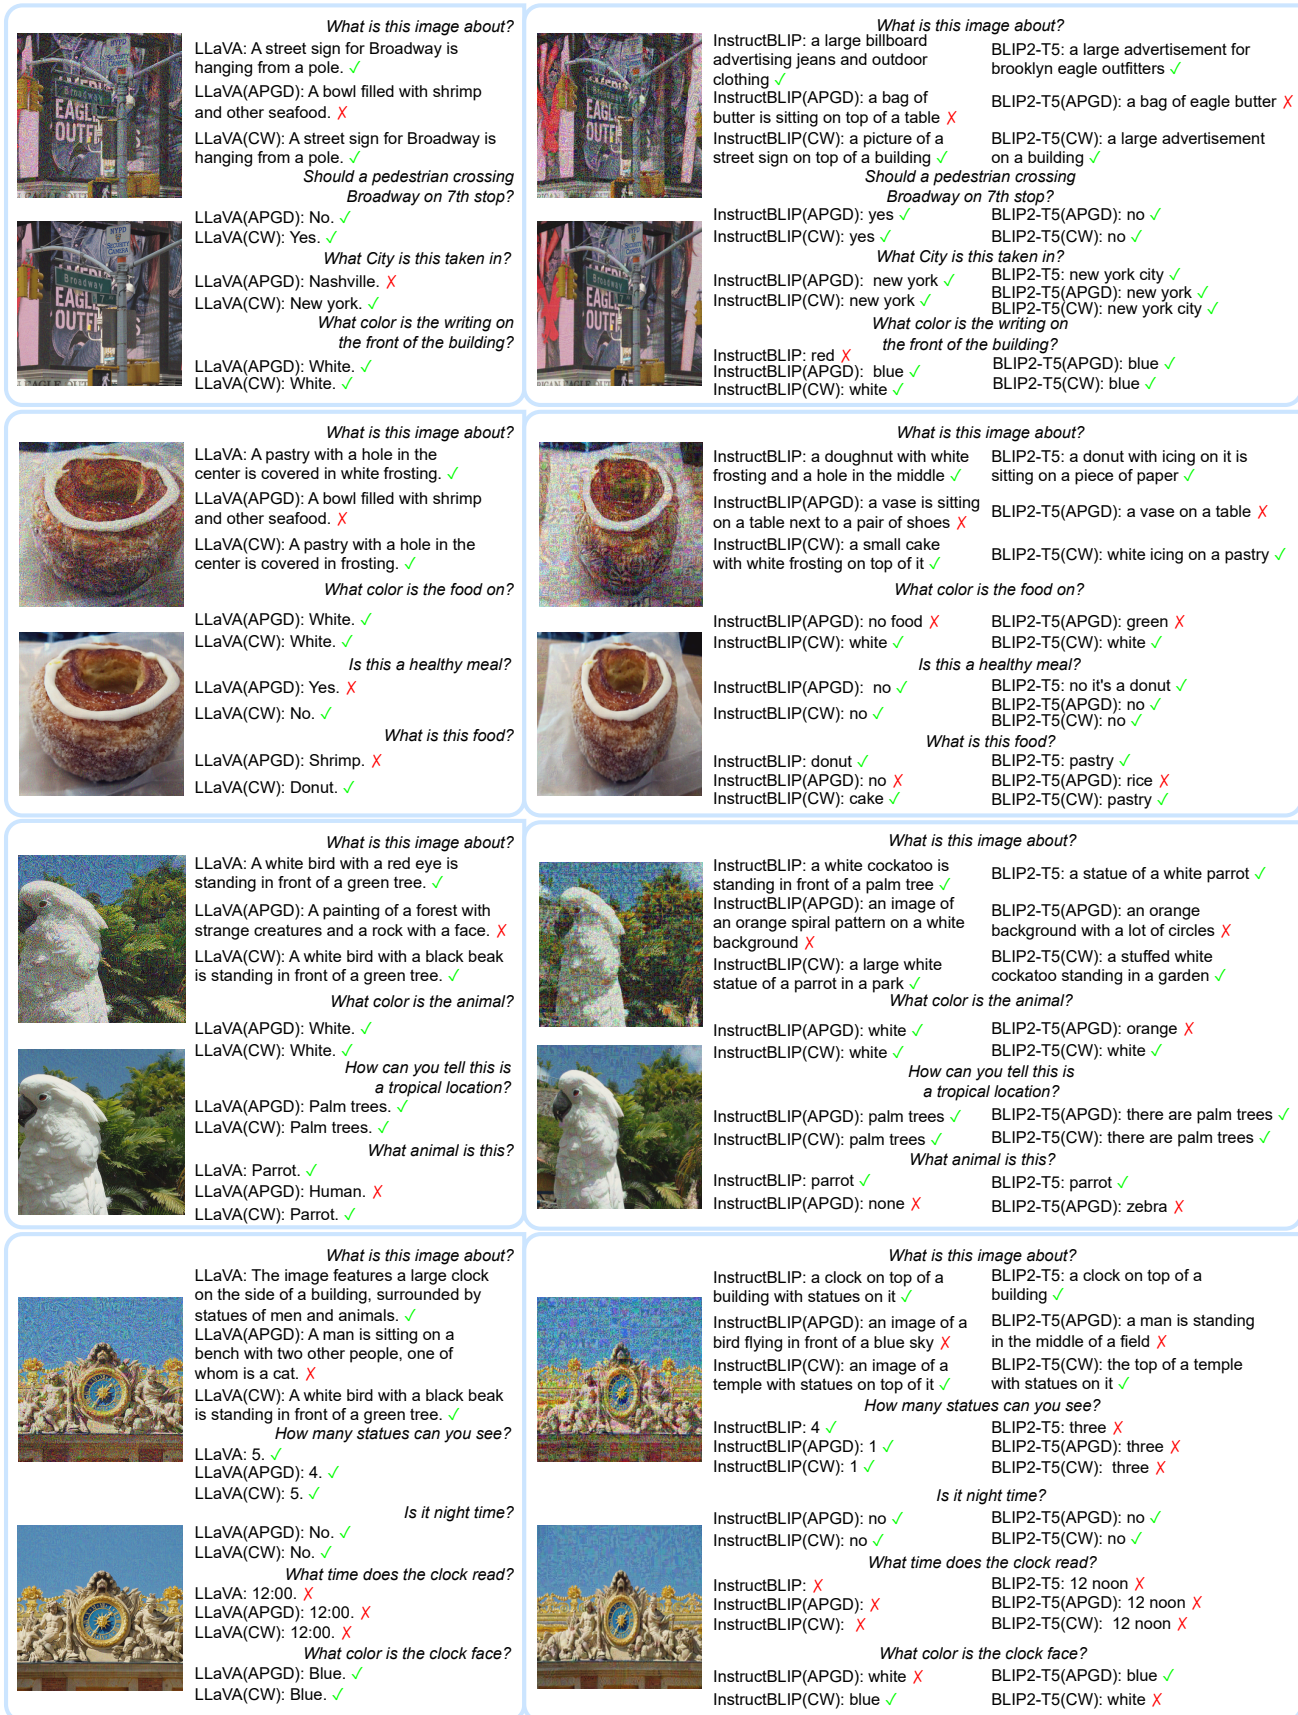

Figure 3. A comparison between the response from three LMMs (LLaVA, BLIP2-T5 and InstructBLIP) on adversarial image generated by APGD<sub>s</sub> and CW<sub>s</sub> with CLIP for LLaVA (left), and EVA-CLIP for BLIP2-T5 and InstructBLIP (mid and right). “(adv)” refers to LMM’s response with the adversarial image. Within each cell, the top/bottom adversarial image is generated by APGD<sub>s</sub>/CW<sub>s</sub>, respectively. We show the clean response when the adversarial response is different. Image and questions source: VQA V2 [4].



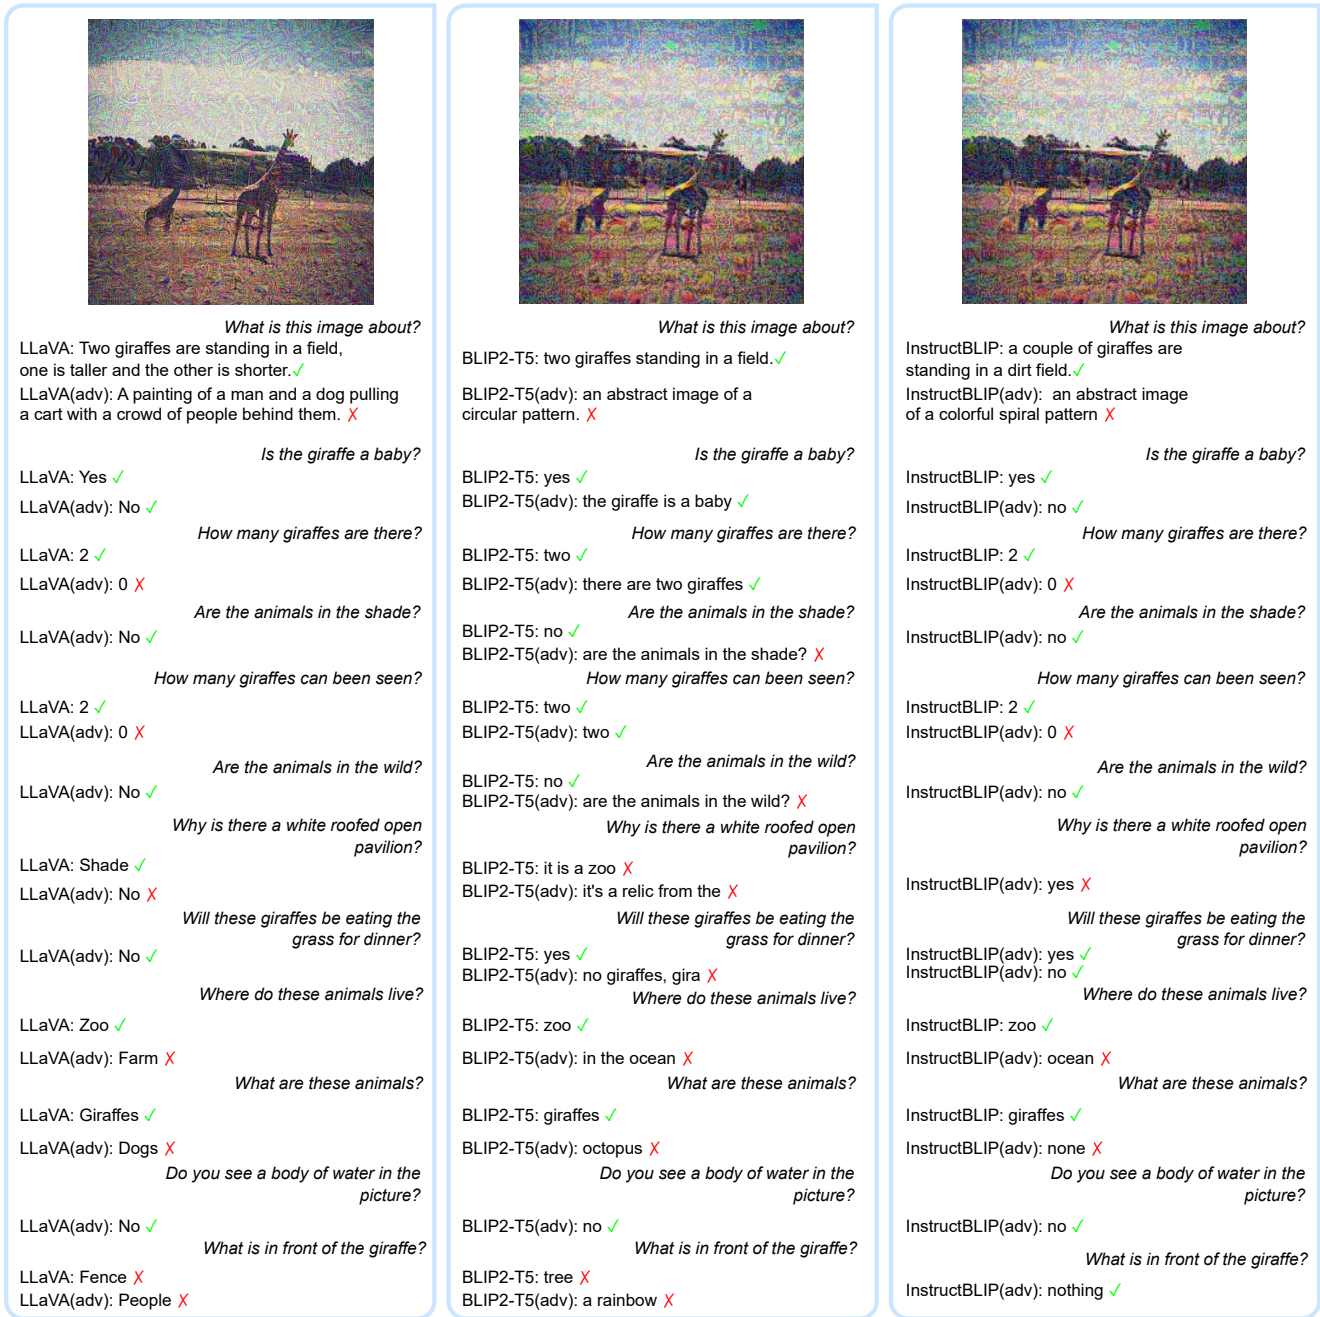

Figure 4. A comparison between responses from three LMMs (LLaVA, BLIP2-T5 and InstructBLIP) on adversarial images generated by APGD<sub>S</sub> with CLIP for LLaVA (left), and EVA-CLIP for BLIP2-T5 and InstructBLIP (mid and right). “(adv)” refers to LMM’s response with the adversarial image. We show the clean response when the adversarial response is different. Image and questions source: VQA V2 [4].
